# Supplementary material for: Comprehensive landscape of neutralizing antibody and cell-mediated response elicited by the 1/5 fractional dose of 17DD-YF primary vaccination in adults
Source: PubMed Central journal article supplement (PMC10987530; doi:10.1038/s41598-024-57645-3), 2024-04-02
Supplement: 41598_2024_57645_MOESM1_ESM.pdf [file 41598_2024_57645_MOESM1_ESM.pdf]

**Comprehensive landscape of neutralizing antibody and cell-mediated response elicited by  
the 1/5 fractional dose of 17DD-YF primary vaccination in adults**

Laise Rodrigues Reis; Ismael Artur Costa-Rocha; Ana Carolina Campi-Azevedo; Vanessa Peruhype-Magalhães; Márcio Sobreira Silva Araújo; Elaine Speziali; Rosiane Aparecida da Silva-Pereira; Lis Ribeiro do Valle Antonelli; Thais Abdala-Torres; Gregório Guilherme Almeida; Eder Gatti Fernandes; Francieli Fontana Sutile Tardetti Fantinato; Carla Magda Allan Santos Domingues; Maria Cristina Ferreira Lemos; Alexandre Chieppe; Jandira Aparecida Campos Lemos; Jordana Graziela Coelho-dos-Reis; Sheila Maria Barbosa de Lima; Adriana de Souza Azevedo; Waleska Dias Schwarcz; Luiz Antônio Bastos Camacho; Maria de Lourdes de Sousa Maia; Tatiana Guimarães de Noronha; Caroline Duault; Yael Rosenberg-Hasson; Andréa Teixeira-Carvalho; Holden Terry Maecker\*; Olindo Assis Martins-Filho\* and Collaborative Group for Studies of Yellow Fever Vaccine

Representative Gating Strategies for Phenotypic and Functional Analysis of T and B-cells following in vitro Stimuli with 17DD-YF Vaccine

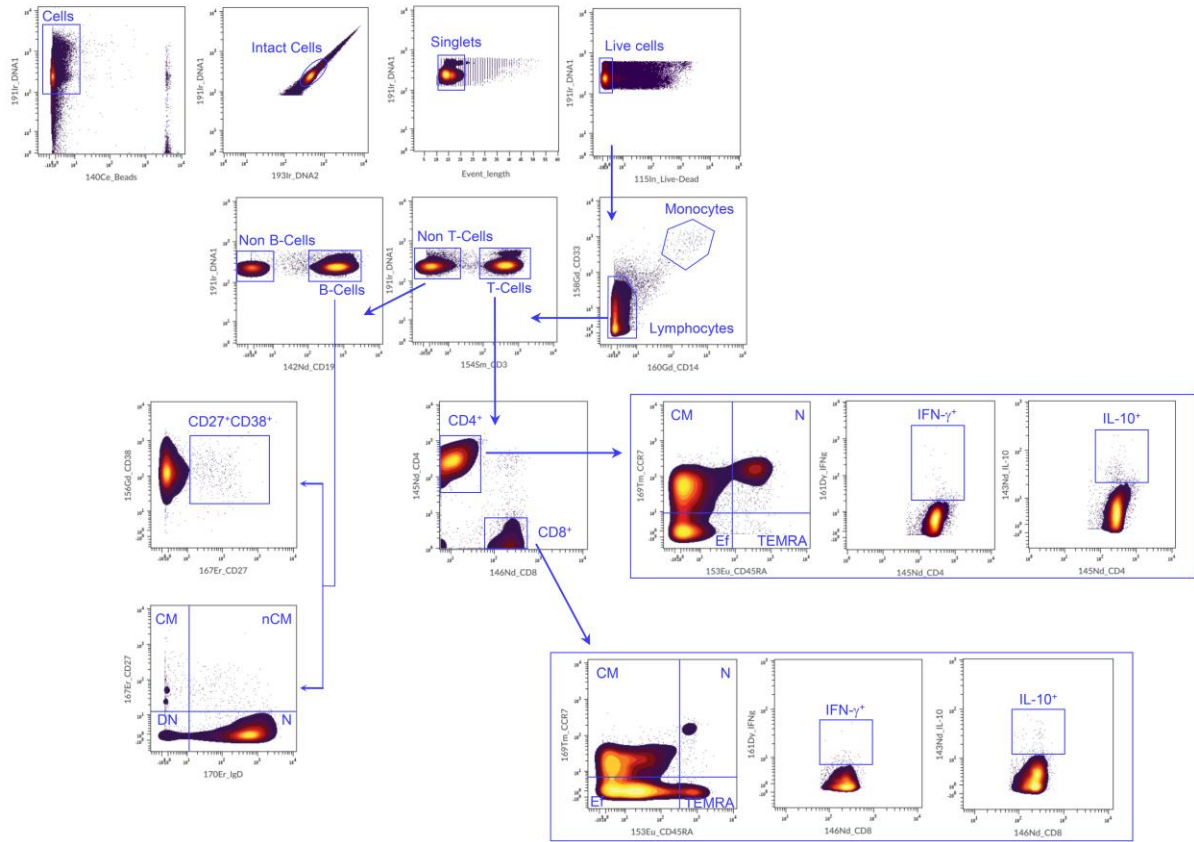

Supplementary Figure 1. Representative gating strategies for phenotypic and functional analysis of T and B-cells following in vitro stimuli with 17DD-YF vaccine. Ungated events were sequentially analyzed using Cytobank shared cloud-based platform using a set of gating strategies as follows: i) 140Ce beads vs 191Ir DNA1 gating to select cells; ii) 193Ir DNA2 vs 191Ir DNA1 plot was used to select singlets identified as positive cells for DNA markers; iii) intact singlets were identified on Event length vs 193Ir DNA2 plot; iv) live intact singlets were gated as negative events for 115In live-dead cell marker; v) lymphocytes were selected as negative events on 160Gd CD14 vs 158Gd CD33 plot; vi) T-cells were gated as 154Sm CD3 positive cells and B-cells selected amongst non-T-cells as 142Nd CD19 positive cells; vii) additional phenotypic/functional features were assessed within gated B and T-cells as illustrated by 167Er CD27 vs 156Gd CD38

and 170Er IgD vs 167Er CD27 for B-cells and 153Eu CD45RA vs 169Tm CCR7 and 161Dy IFN- $\gamma$  or I43Nd IL-10 vs 145Nd CD4 and 146Nd CD8 for T-cell subsets.

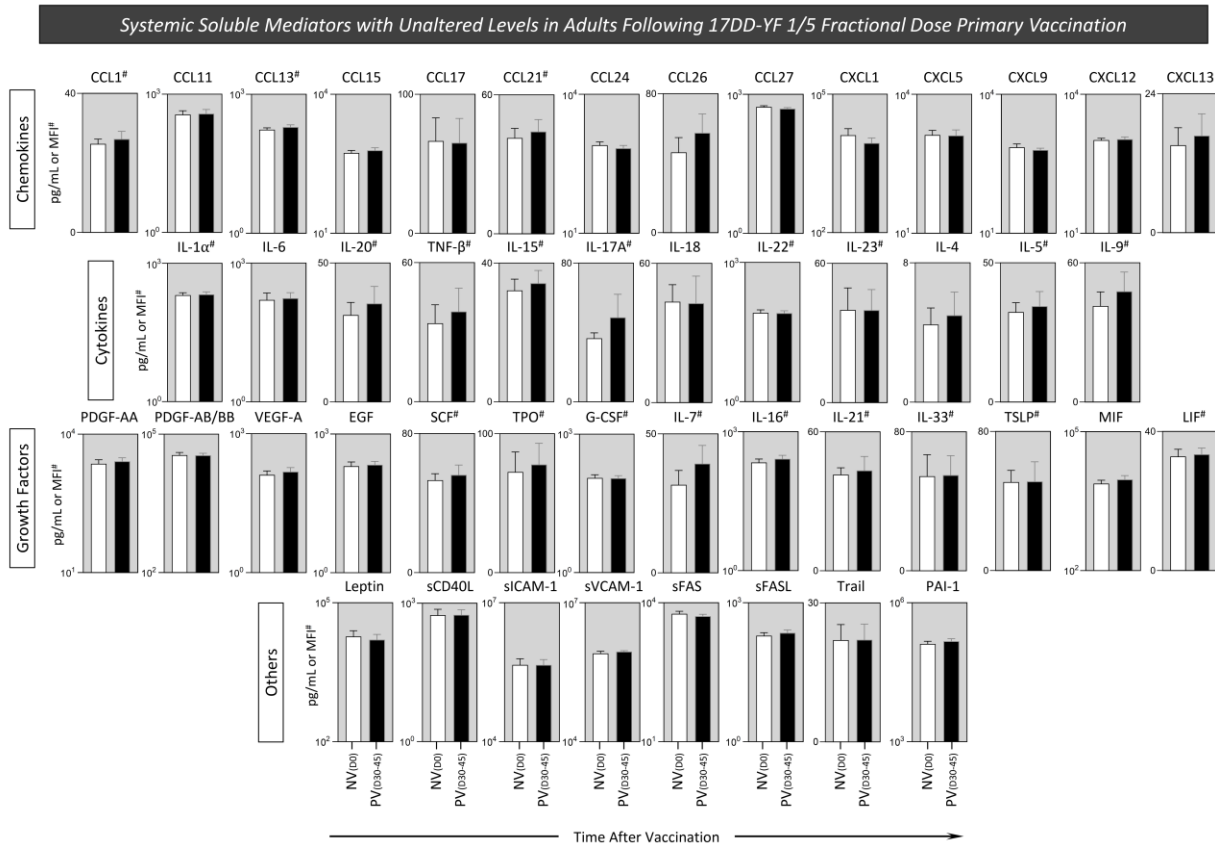

*Supplementary Figure 2. Systemic soluble mediators with unaltered levels in adults following 17DD-YF 1/5 fractional dose primary vaccination. Systemic soluble mediators were measured in plasma samples from all volunteers before (NV<sub>(D0)</sub> = □, n=15) and 30-45 days after (PV<sub>(D30-45)</sub> = ■, n=15) 17DD-YF 1/5 fractional dose primary vaccination. Measurements were carried out by xMAP technology as described in Materials and Methods. The results are shown as mean values  $\pm$  standard error of plasma concentration expressed in pg/mL or MFI (#). Comparative analysis between NV<sub>(D0)</sub> and PV<sub>(D30-45)</sub> was carried out by Student t test. No significant differences were observed between groups at  $p < 0.05$ . Gray background underscores unaltered values observed at PV<sub>(D30-45)</sub> as compared to NV<sub>(D0)</sub>.*
